# Supplementary material
Source: PubMed Central journal article supplement (PMC166250)
Supplement: pnas_100_14_8454__3.pdf [file pnas_100_14_8454__3.pdf]

*PBL sequence*

*MMTY*

*DPAY*

*HERY-K*

*SMRY*

*HRV-5*

*MIAP*

*RSY*

*HIY-1*

*HTLY-1*

*MMLY*

*HFY*

|   |   |   |   |   |   |   |   |   |   |   |   |   |   |   |   |   |   |   |   |   |   |   |   |   |   |   |   |   |   |   |   |   |   |   |   |   |   |
|---|---|---|---|---|---|---|---|---|---|---|---|---|---|---|---|---|---|---|---|---|---|---|---|---|---|---|---|---|---|---|---|---|---|---|---|---|---|
| L | P | Q | G | M | K | N | S | P | T | L | C | Q | K | F | V | D | K | A | I | L | T | V | R | D | K | Y | Q | D | S | Y | I | V | H | Y | M | D | D |
| L | P | Q | G | M | K | N | S | P | T | L | C | Q | K | F | V | D | K | A | I | L | T | V | R | D | K | Y | Q | D | S | Y | I | V | H | Y | M | D | D |
| L | P | Q | G | M | T | N | S | P | T | L | C | Q | K | F | V | A | T | A | I | A | P | V | R | Q | R | F | P | Q | L | Y | L | V | H | Y | M | D | D |
| L | P | Q | G | M | L | N | S | P | T | I | C | Q | T | F | V | G | R | A | L | Q | P | V | R | E | K | F | S | D | C | Y | I | I | H | Y | I | D | D |
| L | P | Q | G | M | A | N | S | P | T | L | C | Q | K | F | V | A | A | A | I | A | P | V | R | S | Q | W | P | E | A | Y | I | L | H | Y | M | D | D |
| L | P | Q | G | M | T | N | S | P | A | I | C | Q | L | Y | V | D | Q | A | V | E | P | V | R | Q | Q | C | P | K | V | Q | I | L | H | Y | M | D | D |
| L | P | Q | G | M | S | N | S | P | T | M | C | Q | L | Y | V | Q | E | A | L | L | P | V | R | E | Q | F | P | S | L | I | L | L | L | Y | M | D | D |
| L | P | Q | G | M | T | C | S | P | T | I | C | Q | L | V | V | G | Q | V | L | E | P | L | R | L | K | H | P | S | L | C | M | L | H | Y | M | D | D |
| L | P | Q | G | W | K | G | S | P | A | I | F | Q | S | S | M | T | K | I | L | E | P | F | R | K | Q | N | P | D | I | V | I | Y | Q | Y | M | D | D |
| L | P | Q | G | F | K | N | S | P | T | L | F | E | M | Q | L | A | H | I | L | Q | P | I | R | Q | A | F | P | Q | C | T | I | L | Q | Y | M | D | D |
| L | P | Q | G | F | K | N | S | P | T | L | F | D | E | A | L | H | R | D | L | A | G | F | R | I | Q | H | P | D | L | I | L | L | Q | Y | V | D | D |
| L | P | Q | G | F | L | N | S | P | A | L | F | T | A | D | V | V | D | L | L | K | E | I | P | N | - | - | - | - | - | - | V | Q | V | Y | V | D | D |
