# Supplementary material
Source: PubMed Central journal article supplement (PMC166250)

ClustalW (v1.4) Multiple Alignment Parameters:

Open Gap Penalty = 10.0; Extend Gap Penalty = 0.0; Delay Divergent = 40%

Gap Distance = 8; Similarity Matrix = blosum

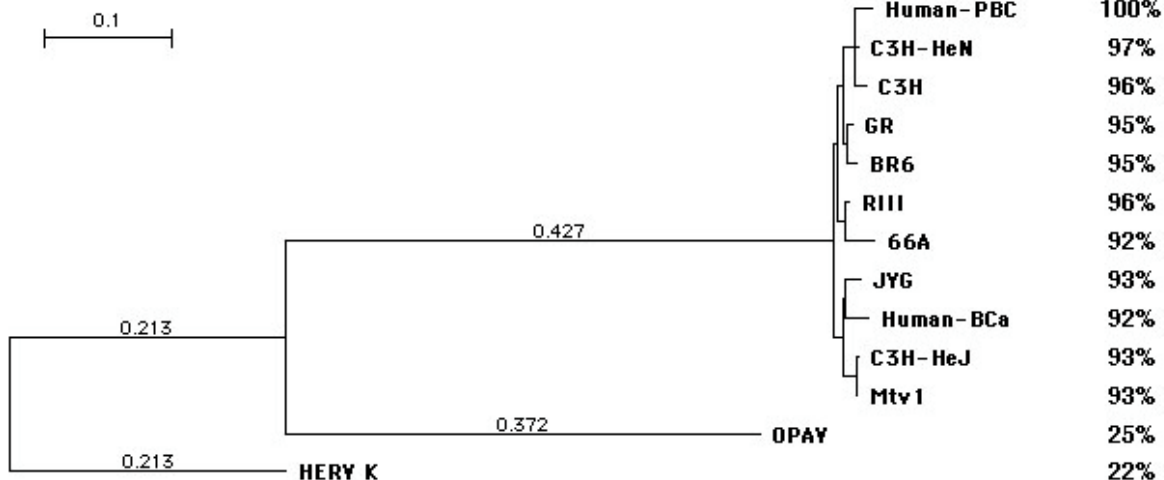

Supplement: pnas_100_14_8454__5.pdf [file pnas_100_14_8454__5.pdf]
